# Supplementary figures and images for: Recalibrating vision-for-action requires years after sight restoration from congenital cataracts
Source: eLife journal article supplement (doi:10.7554/elife.78734), 2022-10-24

Pre-prism target vs response  
(Cataracts)

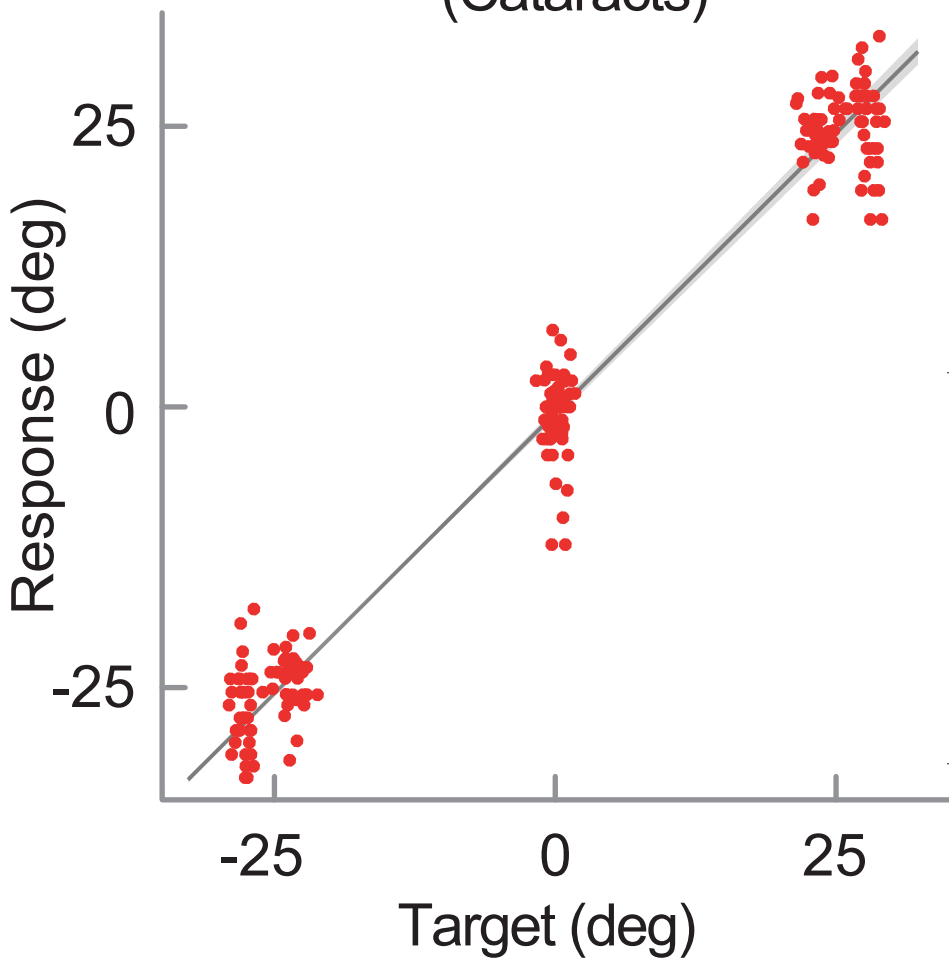

Supplement: supp [file elife-78734-supp-v1.zip]

# Pre-prism pointing error

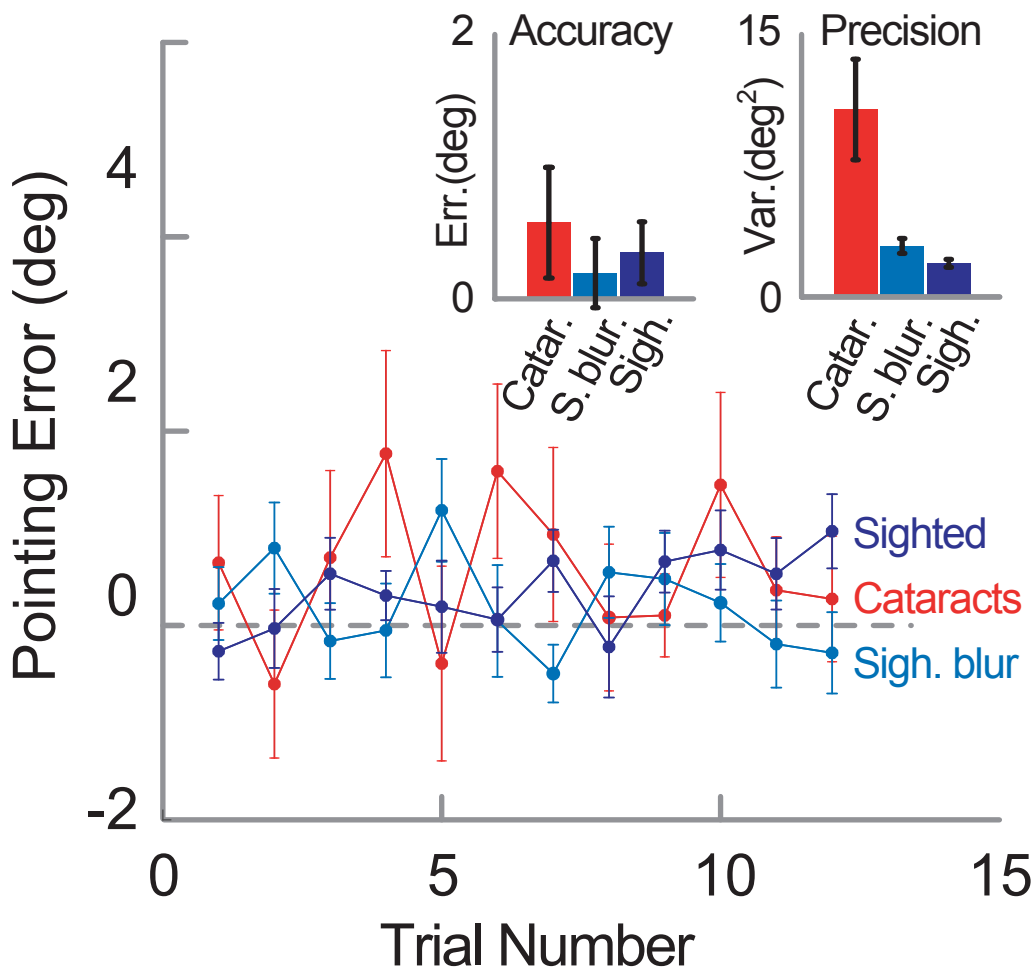

Supplement: supp [file elife-78734-supp-v1.zip]

# Post-prism pointing error

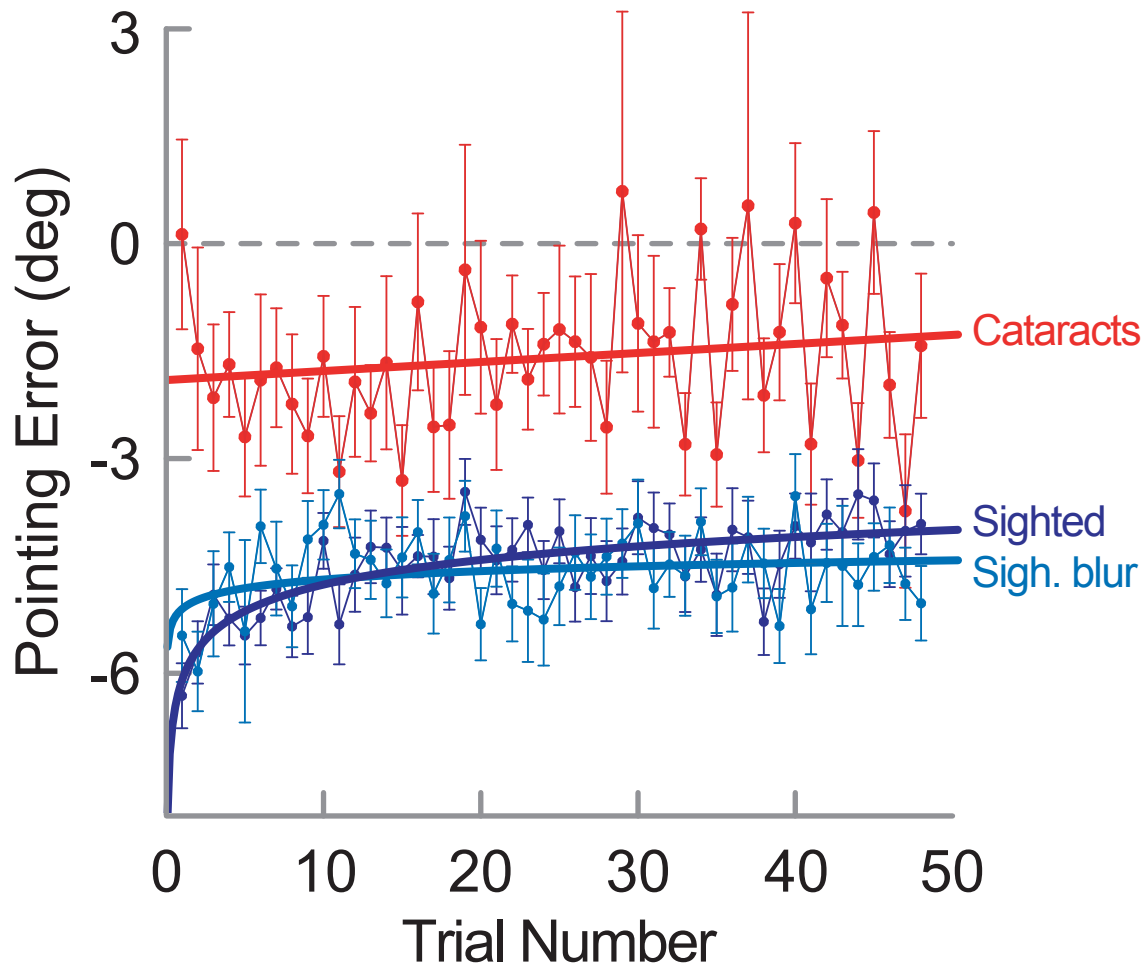

Supplement: supp [file elife-78734-supp-v1.zip]

**A**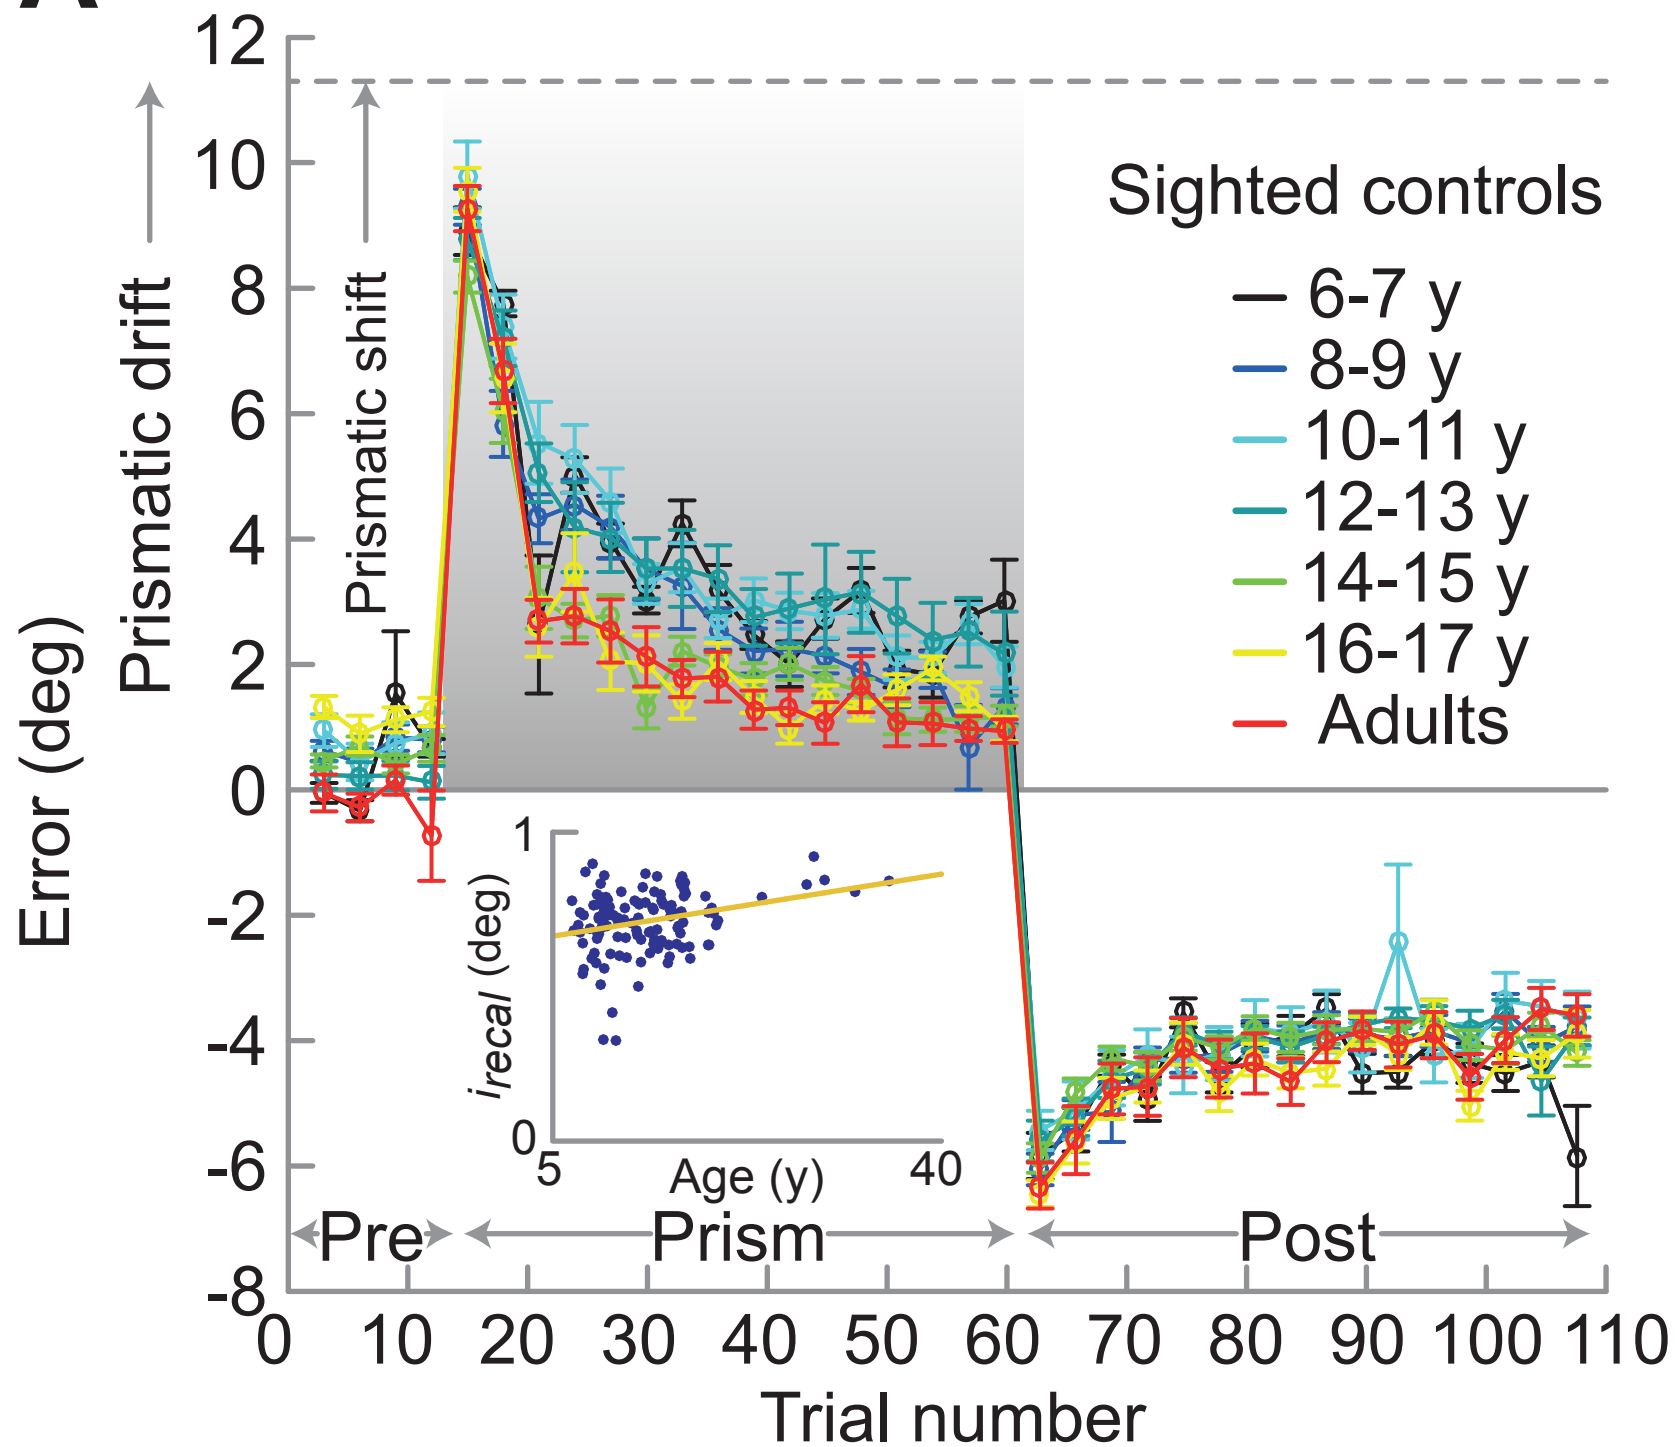

Supplement: supp [file elife-78734-supp-v1.zip]

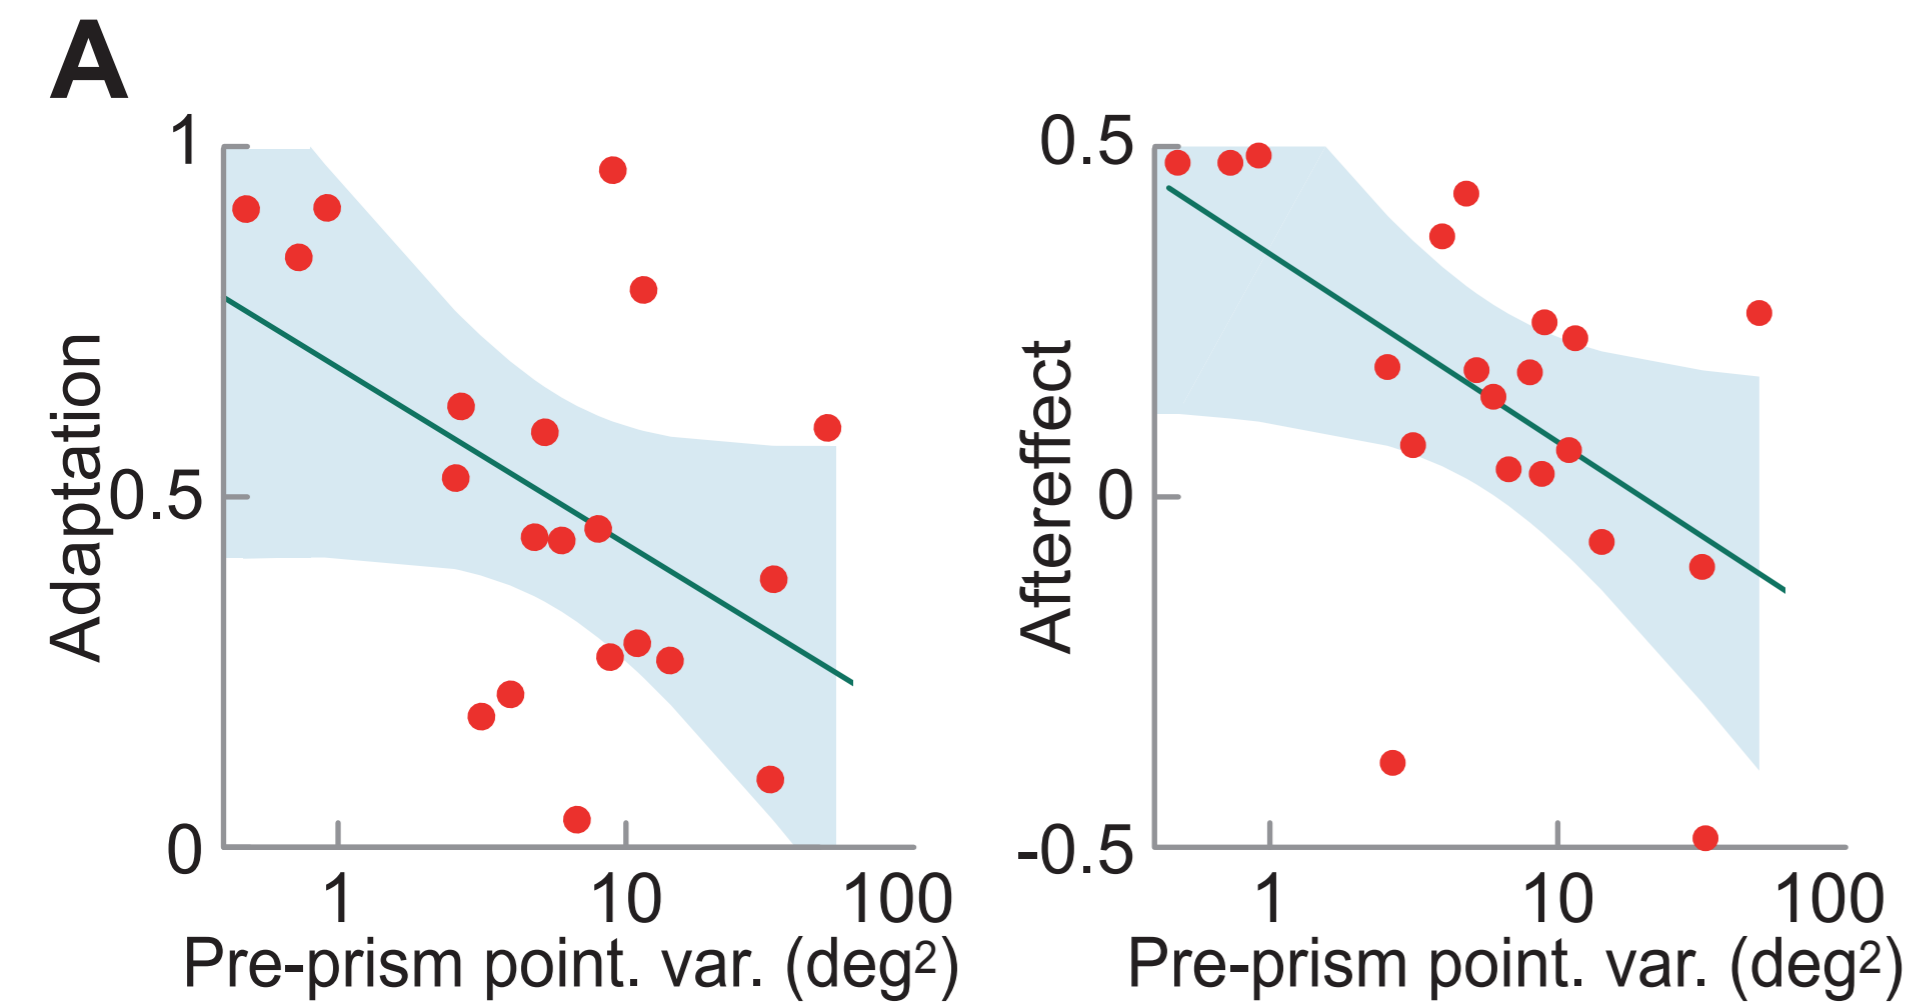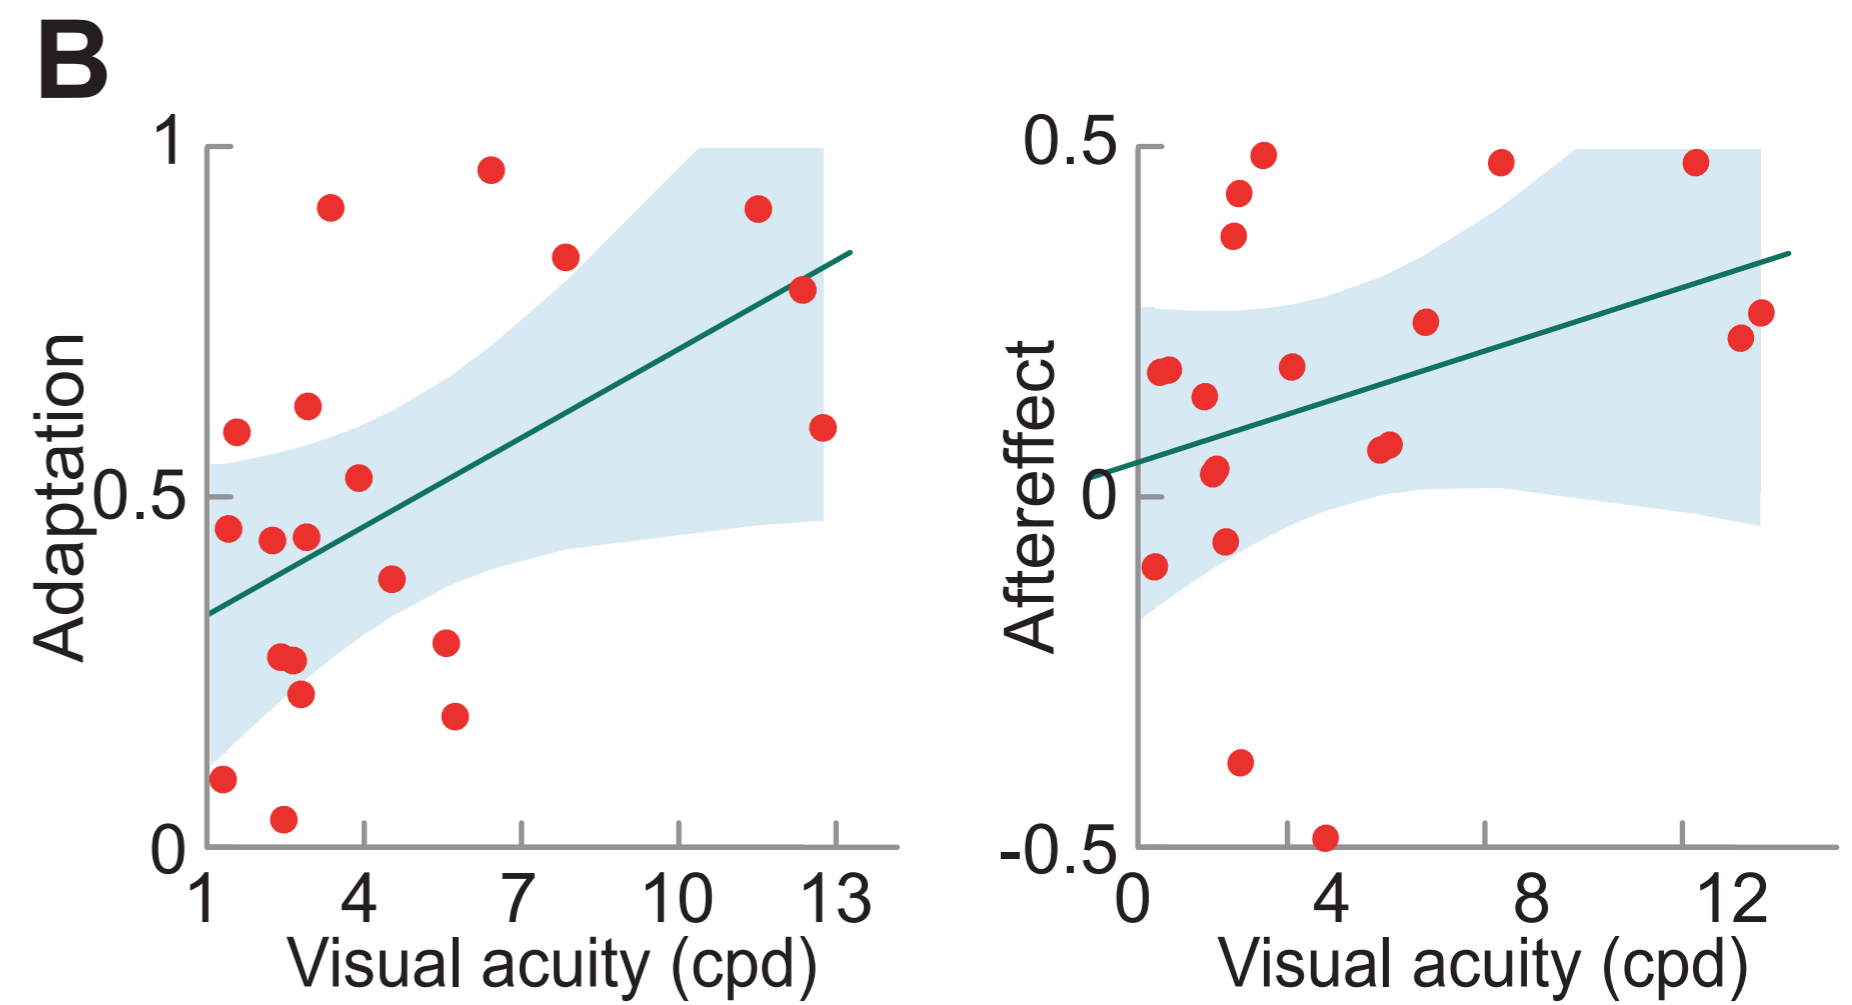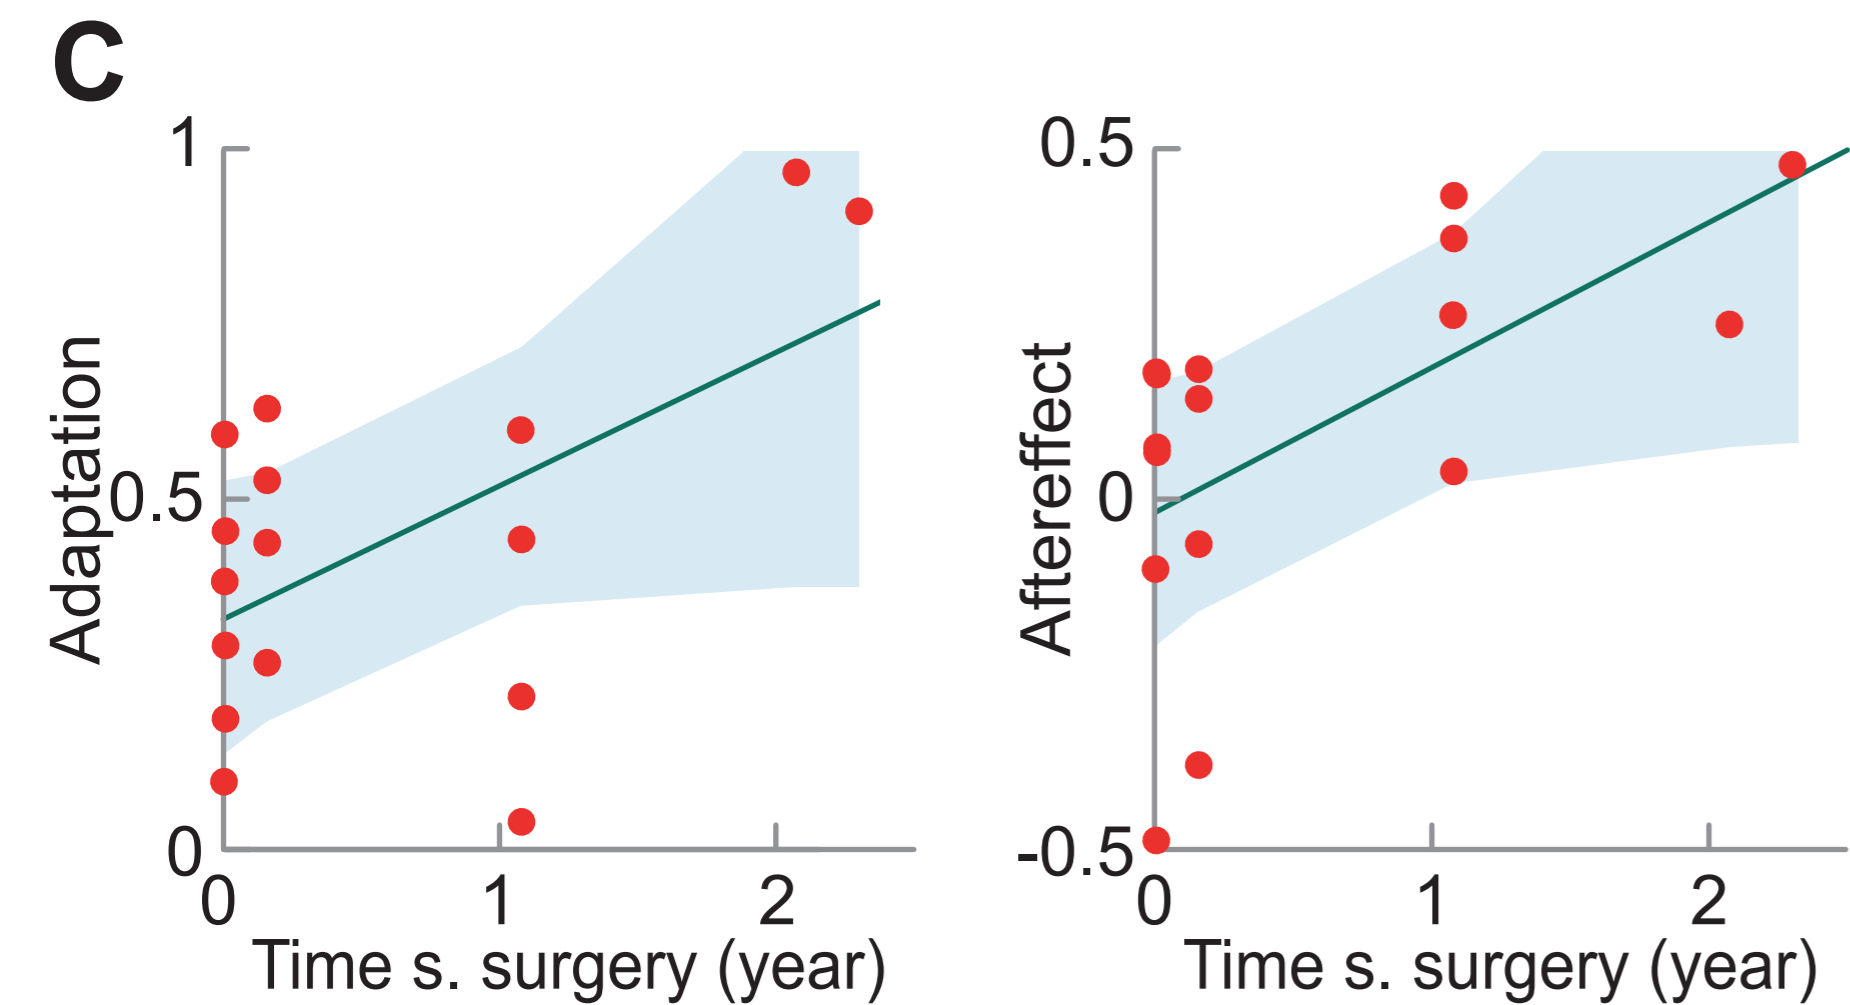

Supplement: supp [file elife-78734-supp-v1.zip]

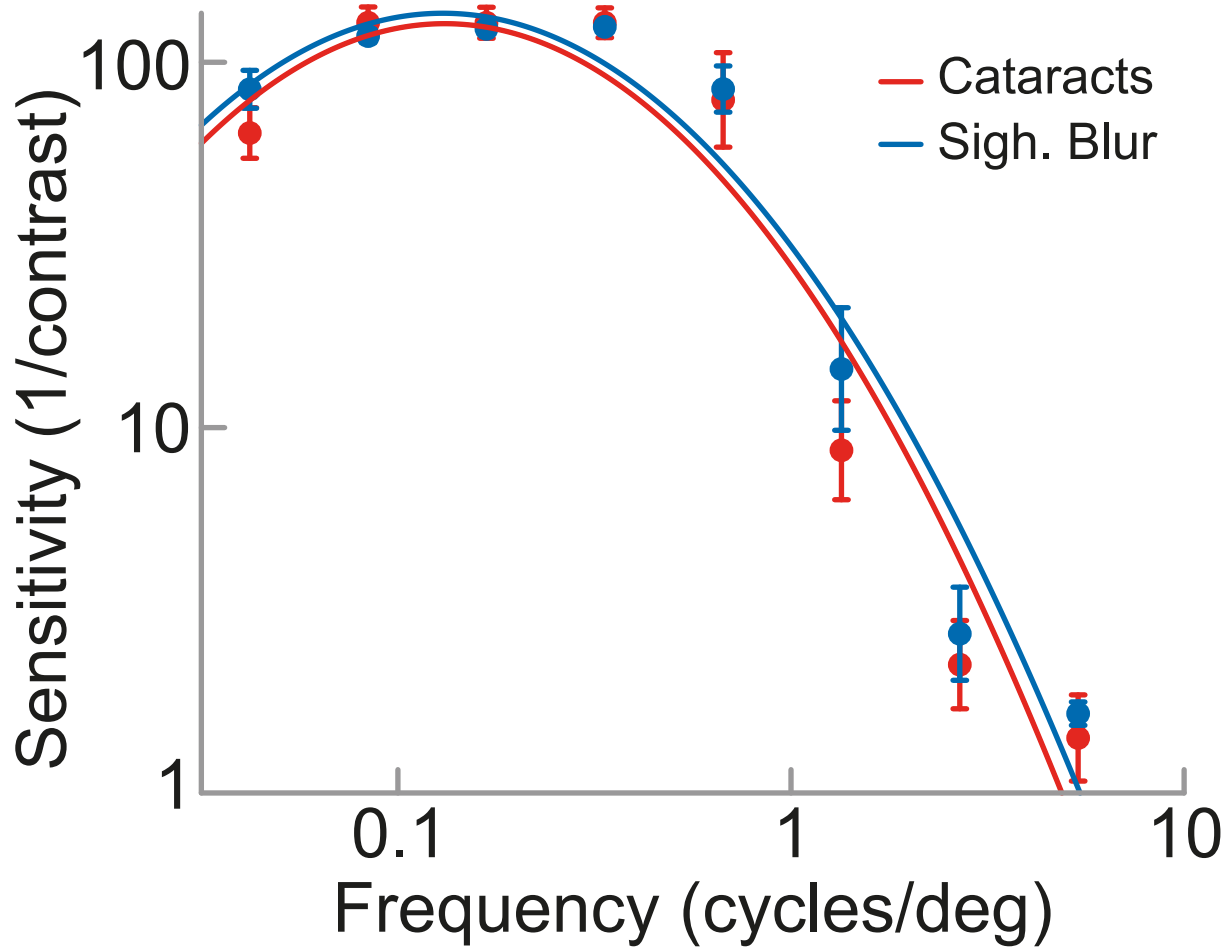

Supplement: supp [file elife-78734-supp-v1.zip]
